# Supplementary material for: The SF3B1R625H mutation promotes prolactinoma tumor progression through aberrant splicing of DLG1
Source: PubMed Central journal article supplement (PMC8762886; doi:10.1186/s13046-022-02245-0), 2022-01-17

A

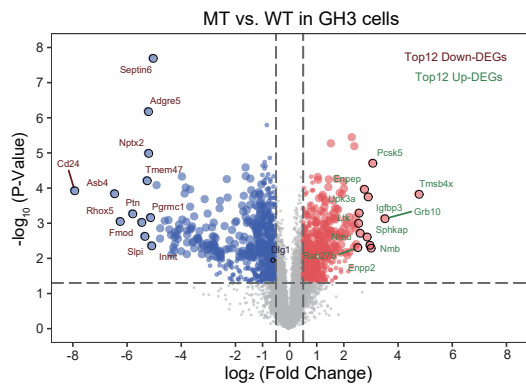

B

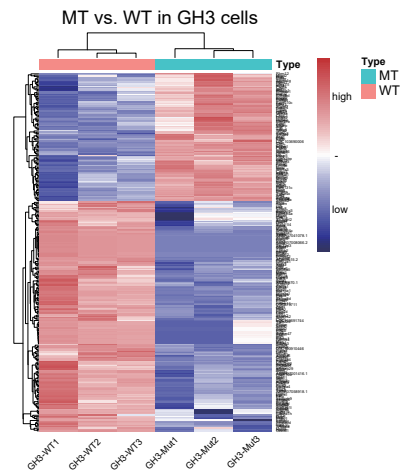

C

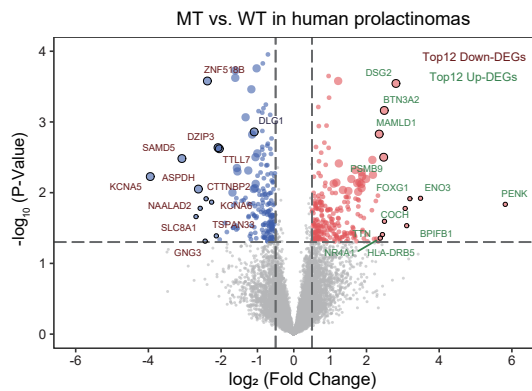

D

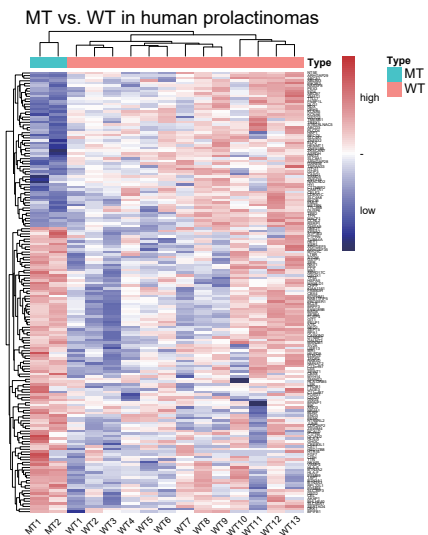

Supplement: 13046_2022_2245_MOESM3_ESM.pdf [file 13046_2022_2245_MOESM3_ESM.pdf]
